# Supplementary material for: Manipulation of the precursor supply for high-level production of longifolene by metabolically engineered Escherichia coli
Source: PubMed Central journal article supplement (PMC6331559; doi:10.1038/s41598-018-36495-w), 2019-01-14

## **Manipulation of the precursor supply for high-level production of longifolene by metabolically engineered *Escherichia coli***

Yujin Cao <sup>1,\*</sup>, Rubing Zhang <sup>1,\*</sup>, Wei Liu <sup>1</sup>, Guang Zhao <sup>1</sup>, Wei Niu <sup>2</sup>, Jiantao Guo <sup>2</sup>, Mo Xian <sup>1</sup>, Huizhou Liu <sup>1</sup>

<sup>1</sup> CAS Key Laboratory of Biobased Materials, Qingdao Institute of Bioenergy and Bioprocess Technology, Chinese Academy of Sciences, Qingdao, China

<sup>2</sup> Department of Chemistry, University of Nebraska-Lincoln, Lincoln, Nebraska, United States

### **Supplementary figure captions**

**Figure S1** Codon optimization of the longifolene synthase gene. wlgfs, wild-type longifolene synthase gene; olgfs, codon-optimized longifolene synthase gene. The identical codons are shown in dark blue and the optimized codons are shown in light blue. The amino acid encoded by each codon is shown as its abbreviation.

**Figure S2** Time-course profiles for cell density (OD<sub>600</sub>) and mevalonate production during shake-flasks culture of strain BL21/pA-mvaES. Cultures were performed in 500 ml shake flasks containing 50 ml liquid M9 mineral medium supplemented with 1 mM MgSO<sub>4</sub> and 20 g/L glucose. Error bars represent the range of three independent fermentations.

**Figure S3** Schematic diagram of the expression constructs containing the genes encoding longifolene biosynthesis pathway. Igfs, longifolene synthase; ispA, *E. coli* FPP synthase; isoA, *B. trispora* FPP synthase; erg20, *S. cerevisiae* FPP synthase; mvaE, acetoacetyl-CoA synthase/HMG-CoA reductase; mvaS, HMG-CoA synthase gene; erg19, mevalonate kinase; erg8, phosphomevalonate kinase; erg12, mevalonate pyrophosphate decarboxylase; idi1, IPP isomerase.



# Figure S1

|       |                                                                   |      |
|-------|-------------------------------------------------------------------|------|
| wlgfS | ATGGCTCAGATTTCTAAATGTTCTGTCACCTGTC CGCCGAGT TGAACGAATCCTCCATCATC  | 60   |
| olgfS | ATGGCTCAGATCAGTAAATGCTCTTCTCTGTCTGCTGAAC TGAACGAATCTCTATCATC      | 60   |
| wlgfS | TCTCATCATCATGGAATCTGTGGGACGACGAT TTCATACAATCTCTTAAAGTCGTCCAAT     | 120  |
| olgfS | TCTCACCACCCACGGTAACTGTGGGACGACGACTTCATC CAGTCTCTGAAATCTCTTAACT    | 120  |
| wlgfS | GGGGCACCTCAAATATCATGAACGCGCTGCCGAAACTT GTTGAAGAAATCAAAGAAATTTAGTT | 180  |
| olgfS | GGTGTCTCCGCAGTACCACGAACGTGCTGCTAAACTG GTTGAAGAAATCAAAGAACTTGGTT   | 180  |
| wlgfS | GTGAGCGAGATGAAAGAT TGCAACGATGATTTAATCAGACGTCTT CAGATGGTTGACAT     | 240  |
| olgfS | GTTTCTGAAATGAAAGACTGCAACGACGACCTGATCCGT CGTCTGCAGATGGTTGACATC     | 240  |
| wlgfS | TTTGAATGTTCTAGGAATTGATCGGCACCTT CAGCATGAAATA CAAGTTGCTCTTGATTAC   | 300  |
| olgfS | TTCCGAATGCCTGGTATCGACCGTCACTTCCAGCACGAAATC CAGGTTGCTCTCGACTAC     | 300  |
| wlgfS | GTGTACAGATAT TGGAACCAGCTGGAAGGCATCGGTAT TGGATCAAGAGATTCCTTATC     | 360  |
| olgfS | GTCTACCGCTACTGGAACCAGCTGGAAGGTATCGGTATCGGT TCTCGTGACTCTCTGATC     | 360  |
| wlgfS | AAAGATTTCAAATGCTACAGCTT TGGGATTTCTGGGCTCTCCGACTGCATCGATATAACGTT   | 420  |
| olgfS | AAAGACTTCAAACGCTACCGCTCTGGGTTTCCGTGCTCTGCGTCTGCACCGTTACAACGTT     | 420  |
| wlgfS | TCCTCAGATGCTTGGAGAATTTCAAGAACGAAAACGGG CAGTTCTTCTGCAGTTCCAG       | 480  |
| olgfS | TCTTCTGACGTTCTGGAAAACTTCAAAAACGAAAACGGT CAGTTCTTCTGCTCTTCTTACC    | 480  |
| wlgfS | GTTGAAGAAAAAGAAGT GAGATGCATGTTGACGT TATTTCGAGCTTCAGAAATTTCAATTT   | 540  |
| olgfS | GTTGAAGAAAAAGAAGTTCGTGTCATGCTGACCCTGTTCCGTGCTTCTGAAATCTCTTTCT     | 540  |
| wlgfS | CCCGGAGAAAAAGT GATGGACGAGGCAAGGCGTTTACACAACA GAATATCTAACC AAAAGTT | 600  |
| olgfS | CCGGGTGAAAAAGTTATGGACGAAGCTAAAAGCTTTCACACCGAATACCTGACC AAAAGTT    | 600  |
| wlgfS | TTAACGGGAGTGGATGTAACG GACGTCATCAAAGCCTTTTGAGAGAAGTGAAGTATGCC      | 660  |
| olgfS | CTGACCGGTGTTGACGTTACCGACGTTAAC CAGTCTCTGCTGCGTGAAGTTAAATACGCT     | 660  |
| wlgfS | CTGGAGTTTCCATGGCATTGCAGTTTGCCGAGATGGGAGGCAAGGAGCTTTATCGAAATA      | 720  |
| olgfS | CTGGAATTCCTCCGTGGCACTGCTCTCTGCCGCGTGGGAAGCTCGTTCTTTATCGAAATC      | 720  |
| wlgfS | TGTGGACAAAACGATTCATGGCTCAAGTGGATATGAACAAACGAGTTT TAGAGTTGGGG      | 780  |
| olgfS | TGCGGT CAGAACGACTCTGGCTGAAATCTATCATGAACAAACGTTTCTGGAAC TGGCT      | 780  |
| wlgfS | AAATGGACTTCAAATATTTTGCAATGGGCACATCATAGAGA ACTACAGCTTCTGTCAAGT     | 840  |
| olgfS | AAACTGGACTTCAACATCTGCAAGTGGGCTCACACCGTGAACTGCAGCTGCTGTCTTCT       | 840  |
| wlgfS | TGGTGGTCACAAATCGGATATAGCGCAGCAGAA TTCTATCGGAAAGCGTCACGTTGAATTT    | 900  |
| olgfS | TGGTGGTCTCAGTCTGACATCGCTCAGCAGAACTTCTACCGTAAAAGCGTCACGTTGAATTC    | 900  |
| wlgfS | TACTTATGGGTGTTATAGGCACGTTTCGAGCCGGAGTTT TCAACATGCAGAATCACCTTT     | 960  |
| olgfS | TACCTGTGGGTGTTATCGGTACCTTCGAAACCGGAATTCCTTACCTGCGTATCACCTTC       | 960  |
| wlgfS | GCAAAAATCTCTACACTGATGACTATTTCTAGATGACCTCTACGATAC TACGGAACGTTG     | 1020 |
| olgfS | GCTAAAATCTCTACCCTGATGACCATCTTGACGACCTGTACGACACCCACGGTACCTG        | 1020 |
| wlgfS | GAACAACCTCAAATCTTCACAGAGGGAGTGAACGATGGGATCTTTCGTTAGTAGACCGC       | 1080 |
| olgfS | GAACAGCTGAAAATCTTCACCGAAGGTGTTAAACGTGGGACCTGTCTCTGGTTGACCGT       | 1080 |
| wlgfS | CTTCCAGACTACATAAAGATTACATTCGAATTCCTTCTCAACACATCTAAATGAATTGAT      | 1140 |
| olgfS | CTGCCGACTACATCAAATCACCTTCGAATTCCTTCTCAACACCTCTAACGAAC TGATC       | 1140 |
| wlgfS | GCTGAAGTTGCGAAAACGCAAGAGCGGGATATGTCAGCCTACATA CGAAAACATGGGAA      | 1200 |
| olgfS | GCTGAAGTTGCTAAAACCCAGGAACGTGACATGTCGCTTACATCCGTAAAACCTGGGAA       | 1200 |
| wlgfS | CGATACCTTGAAGCTTATTTGCAAGAAGCGGAATGGATAGCAGCTCGACACGTTCCCTAGG     | 1260 |
| olgfS | CGTTACCTTGAAGCTTACCTGCAGGAAGCTGAATGGATCGCTGCTCGTCACGTTCCGACC      | 1260 |
| wlgfS | TTTGATGAGTACATGAAGAATGGCATATCCAGTTCTGGGATGTGTATACTAAATTTGTAT      | 1320 |
| olgfS | TTTCGACGAAATACATGAAAACGGTATCTCTTCTTCTGGTATGTGCATCTGAACCTGTAC      | 1320 |
| wlgfS | TCGCTTCTGTTAATGGGGCAACTTCTACCTGACGACGTTCTGGAGCAAATACACTCTCCA      | 1380 |
| olgfS | TCTCTGCTGCTGATGGGTGAGCTGCTGCCGGACGACGTTCTGGAAACAGATCACTCTCCG      | 1380 |
| wlgfS | TCCAAGATCCACGAGCTTGTAGAAATGACGGCCAGACTGGTAGACGACTCAAAGGATTTT      | 1440 |
| olgfS | TCTAAAATCCACGAACTGGTGAACCTGACCGCTCGTCTGGTTGACGACTCTAAAGACTTC      | 1440 |
| wlgfS | GAGACGAAGAAAGTTGGTGGGGAGTTAGCTTTCAGGTATAGAGTGT TACGTGAAAGACAAC    | 1500 |
| olgfS | GAAACCAAAAAAGTTGGTGGTGAACCTGCTTCTGGTATGAATGCTACGTTAAAGACAAC       | 1500 |
| wlgfS | CCTGAATGTACACTGGAAGATGCTTCAAATCATCTAAATGGCCTCCTTGATCTTACCGTT      | 1560 |
| olgfS | CCGGAATGCACCCTGGAAGACGCTTCTAACACACCTGAACGGTCTGCTGGACCTGACCGTT     | 1560 |
| wlgfS | AAGGAATGAAATGGGAGTTTGTAAAGCATGACAGCGTGGCCTGTGTGTTTCAAGAAAGTTC     | 1620 |
| olgfS | AAAGAACTGAACTGGGAATTCGTTCCTCACGACTCTGTGCTCTGTGCTTCAAAAAATTC       | 1620 |
| wlgfS | GCCTTCAACGTTGCACGAGGCCTCCGACTTATCTACAAATACAGAGACGGCTTTGACGTT      | 1680 |
| olgfS | GCTTTC AACGTTGCTCGTGGTCTGCTCTGATCTACAAATACCGTGACGGTTTCGACGTT      | 1680 |
| wlgfS | TCTAACCAGGAGATGAAAACCCACATATTCAAATCTCATCGATCCACTTACTTAG           | 1737 |
| olgfS | TCTAACCAGGAAATGAAAACCCACATCTTCAAATCTGATCGACCCGCTGACCTAA           | 1737 |



Figure S2

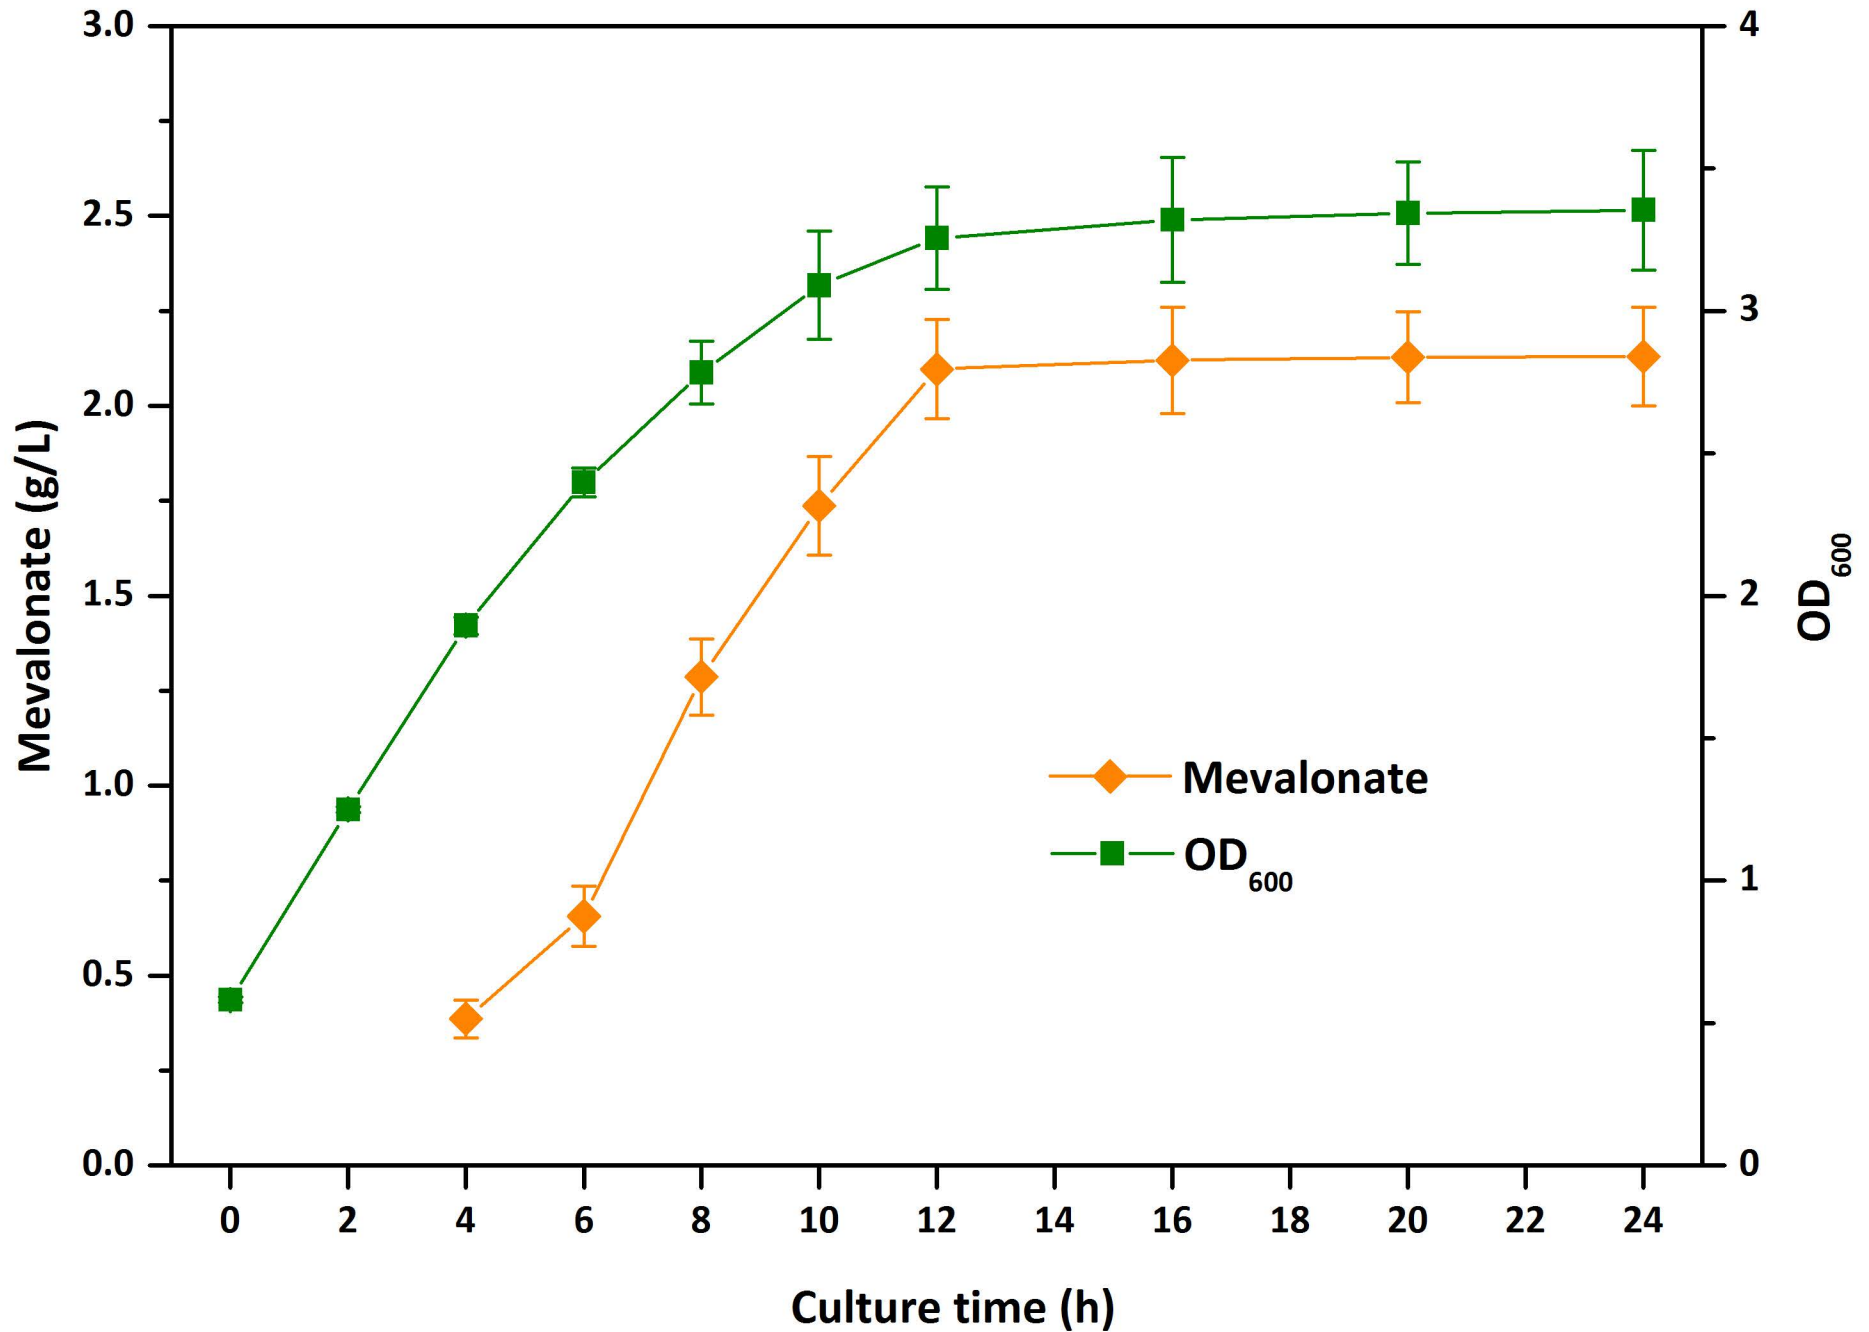

Figure S3

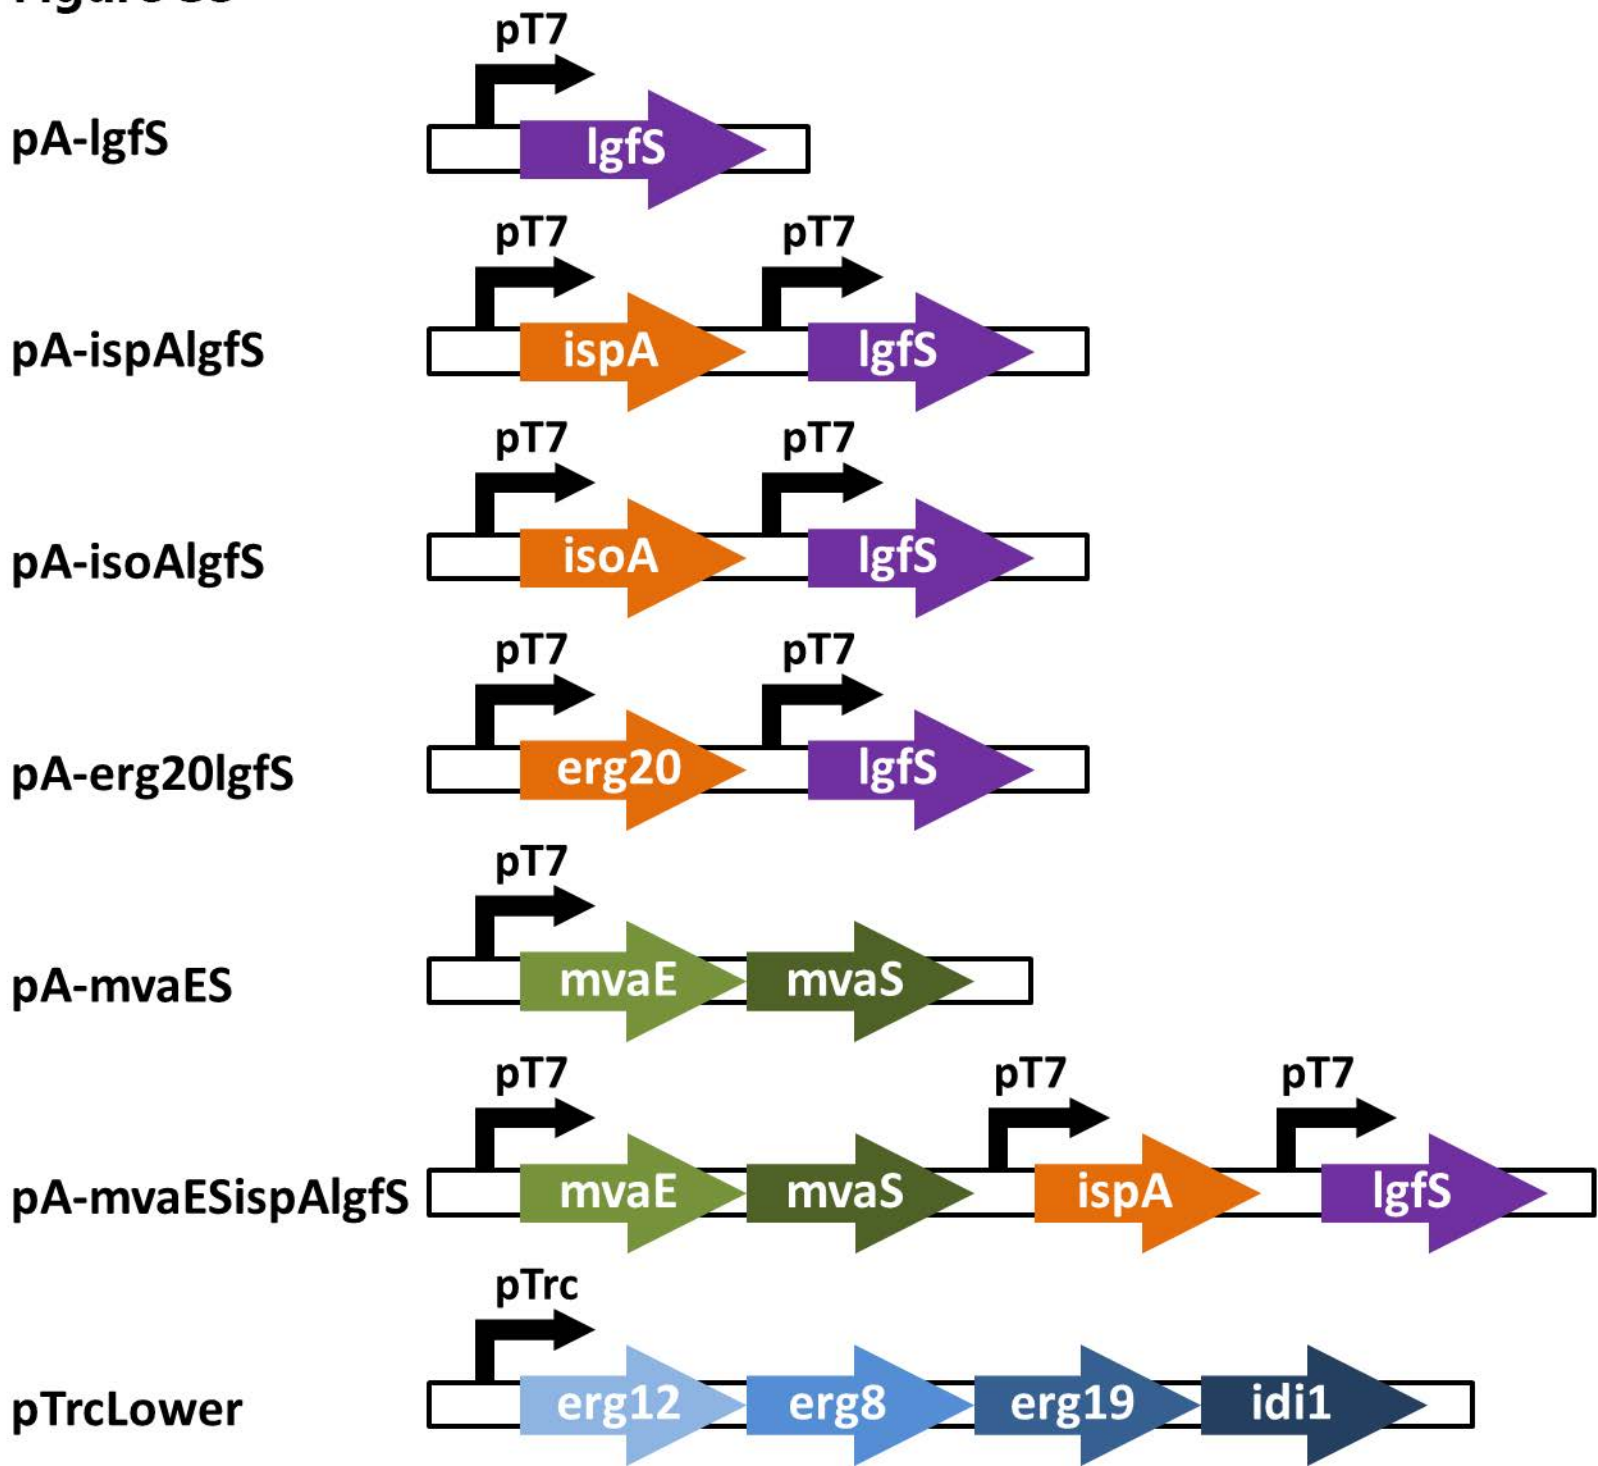

Supplement: 41598_2018_36495_MOESM1_ESM.pdf [file 41598_2018_36495_MOESM1_ESM.pdf]
